# Supplementary material for: Assessing the impacts of dynamic soft-templates innate to switchable ionic liquids on nanoparticulate green rust crystalline structures
Source: Royal Society of Chemistry journal article supplement (doi:10.1039/c9cc04581c), 2019-01-01
Supplement: c9cc04581c1.pdf [file c9cc04581c1.pdf]

## Supporting information for

### **Assessing the Impacts of Dynamic Soft-Template Innate to Switchable Ionic Liquids on Nanoparticulate Green Rust Crystalline Structure**

*Jian Zheng,<sup>1</sup> Xiao-Ying Yu,<sup>2\*</sup> Manh-Thuong Nguyen,<sup>1</sup> David Lao,<sup>2</sup> Yifeng Zhu,<sup>2</sup> Feng Wang,<sup>3</sup> and David J. Heldebrant<sup>2\*</sup>*

<sup>1</sup> Physical and Computational Sciences Directorate, Pacific Northwest National Laboratory, Richland, WA 99354, USA

<sup>2</sup> Energy and Environment Directorate, Pacific Northwest National Laboratory, Richland, WA 99354, USA

<sup>3</sup> Sustainable Energy Technologies Department, Brookhaven National Laboratory, Upton, NY 11973, USA.

#### **Corresponding Author**

[\\*xiaoyingyu@pnnl.gov](mailto:*xiaoyingyu@pnnl.gov) [\\*david.heldebrant@pnnl.gov](mailto:*david.heldebrant@pnnl.gov)

## Table of Contents

|                                                                                                                                                                                                                                                                                                                                                                                              |    |
|----------------------------------------------------------------------------------------------------------------------------------------------------------------------------------------------------------------------------------------------------------------------------------------------------------------------------------------------------------------------------------------------|----|
| <b>Sample preparation</b> .....                                                                                                                                                                                                                                                                                                                                                              | 4  |
| <b>XAS experiment</b> .....                                                                                                                                                                                                                                                                                                                                                                  | 4  |
| <b>In situ liquid SIMS experiment</b> .....                                                                                                                                                                                                                                                                                                                                                  | 5  |
| <b>Data analysis</b> .....                                                                                                                                                                                                                                                                                                                                                                   | 5  |
| <b>FEFF simulation</b> .....                                                                                                                                                                                                                                                                                                                                                                 | 5  |
| <b>DFT calculation</b> .....                                                                                                                                                                                                                                                                                                                                                                 | 6  |
| Supplemental Figures .....                                                                                                                                                                                                                                                                                                                                                                   | 6  |
| <b>Figure S1.</b> The schematic showing the top and side view of the SALVI cell in relation to the overall beamline setup; and a photo of the SALVI device is also shown. <sup>4</sup> .....                                                                                                                                                                                                 | 7  |
| <b>Figure S2.</b> SWIL sample preparation and relationship to each other: (1) Fe(OAc) <sub>2</sub> dissolved in DBU and 1-hexanol (light brown solution); (2) CO <sub>2</sub> added to solution 1 to form ionic liquid (colorless solution); (3) methanol added to 2 to form carbonate green rust solution; and (4) CO <sub>2</sub> removed to form green rust suspension/precipitation..... | 8  |
| <b>Figure S3.</b> (a) Normalized and (c) first derivative spectra of Fe-XANES of the as-prepared 1, 2, 3, and 4. (b) The pre-edge feature at 7106–7118 eV, corresponding to the 1s→3d electronic transition for Fe. (d) XANES spectra comparison of Fe foil and FeOOH (Lepidocrocite) references with 2 and 3. ....                                                                          | 9  |
| <b>Figure S4.</b> The k <sup>2</sup> -weighted Fe-EXAFS χ(R) spectra of the as-prepared 1, 2, 3, 4, and Fe <sub>2</sub> O <sub>3</sub> and FeOOH (Lepidocrocite) references.....                                                                                                                                                                                                             | 10 |
| <b>Figure S5.</b> Considered structures of (DBU) <sub>n</sub> -Fe systems, n =1, 2, 3, and 4. Green, purple, grey and white spheres represent Fe, N, C and H atoms, respectively. ....                                                                                                                                                                                                       | 11 |
| <b>Figure S6.</b> Possible structures of the Fe-hexylcarbonate cluster in the ionic solution: Fe in Sol-(a), Sol-(b), and Sol-(c) is 2, 4, and 5 coordinated. Green, red, grey and white spheres represent Fe, O, C and H atoms, respectively.....                                                                                                                                           | 12 |
| <b>Figure S7.</b> Comparison of Fe k-edge EXAFS (a) Mag χ(R), (b) χ(k) and (c) Img χ(R) spectra and (d) XANES spectra for solution 3 and FeOOH (Lepidocrocite) reference.....                                                                                                                                                                                                                | 13 |
| <b>Figure S8.</b> k <sup>2</sup> -weighted Fe K-edge (a) Img[χ(R)] and (b) χ(k) spectra of Fe <sub>2</sub> O <sub>3</sub> reference and the obtained FEFF fits. ....                                                                                                                                                                                                                         | 14 |
| <b>Figure S9.</b> In situ liquid ToF-SIMS spectral analysis of the green rust in DBU and hexanol SWIL in the positive ion mode. ....                                                                                                                                                                                                                                                         | 15 |
| Supplemental Tables .....                                                                                                                                                                                                                                                                                                                                                                    | 16 |
| <b>Table S1.</b> The Fe-N bonding distance, and the binding energy per molecule. ....                                                                                                                                                                                                                                                                                                        | 16 |
| <b>Table S2.</b> The Fe-O bonding distance, and the relative energy to Sol-(b). ....                                                                                                                                                                                                                                                                                                         | 17 |
| <b>Table S3.</b> The parameters determined by fitting the experimental spectrum of Fe <sub>2</sub> O <sub>3</sub> . Other parameters: amplitude reduction factor (amp) S <sub>0</sub> <sup>2</sup> = 0.84 ± 0.2, R-factor = 0.01, and E <sub>0</sub> = -2.3. ....                                                                                                                            | 18 |
| <b>Table S4.</b> Cartesian coordinates .....                                                                                                                                                                                                                                                                                                                                                 | 19 |
| Reference .....                                                                                                                                                                                                                                                                                                                                                                              | 22 |



## Supplemental Experimental Details

### Sample preparation

High-purity (99.999%) CO<sub>2</sub> and Ar were purchased from Matheson. Fe(C<sub>2</sub>H<sub>3</sub>O<sub>2</sub>)<sub>2</sub> (99.99%) and Fe<sub>2</sub>O<sub>3</sub> (99.995%) were obtained from Sigma-Aldrich. 1-hexanol and DBU were provided by Acros. All green rust was synthesized according to the synthetic procedure outlined in previous work.<sup>1</sup> Three 5 mL 0.1 M solutions were made by dissolving Fe(C<sub>2</sub>H<sub>3</sub>O<sub>2</sub>)<sub>2</sub> (Sigma- Aldrich) equimolar mixture of oxygen-free 1-hexanol (Acros) and DBU (Acros) in a nitrogen-filled dry box. One sample was set aside and used as the non-ionic solvent for testing. The two remaining samples were loaded with CO<sub>2</sub> by sparging in the dry box for an hour at room temperature. CO<sub>2</sub> loading was confirmed gravimetrically. One sample was set aside as the ionic solvent for testing. The third clear, nearly colorless sample was diluted to 0.05 M with dry, oxygen-free methanol, which resulted in a clear, dark green solution immediately upon mixing. The three samples were placed in glass 1 dram vials fitted with a gas-tight screw cap and sealed with parafilm prior to shipping to the beamline. Once received at the beamline at Brookhaven National Laboratory, the vials were stored in glove box. The sample injection into the SALVI device was all handled in the glove box.

### XAS experiment

The details of vacuum compatible microfluidic reactor, SALVI fabrication can be found in our previous publications.<sup>2-4</sup> Briefly, soft lithography was applied to make a 500 μm wide by 300 μm deep channel on a silicon wafer as the microfluidic mold. The wider channel was selected because the beam size was about 300 μm. The XAS measurements were conducted in the X18A beamline at National Synchrotron Light Source (NSLS) at the Brookhaven National Laboratory (BNL). The beam energy was selected using a Si(111) monochromator with channel-cut crystal. The beam has x-ray energies ranging from 4.7 keV to 31 keV. Polydimethylsiloxane (PDMS) was filled in the mold to form the block with the channel after it is hardened. A 100 nm thick SiN membrane window supported on a silicon frame (frame size 7.5×7.5 mm<sup>2</sup>, window size 1.5×1.5 mm<sup>2</sup>, Norcada) was bonded to the PDMS block after oxygen plasma treatment. The channel length was between 2.5 mm and 3.0 mm. The two pieces were attached to each other by immediate contact to seal the microchannel and form the detection area. The microfluidic device was attached to a sample holder (Figure. S3) and inserted in the existing setup. During an experiment, the device was moved vertically along the channel relative to the beam to obtain multiple measurements. The

spectra were collected with the SALVI device integrated to the synchrotron beam in the fluorescence mode using a passivated implanted planar silicon (PIPS) detector.<sup>5</sup> The distance of the fluorescence detector to the sample was adjusted to a suitable value to maximize the signal but to avoid self-sorption by the liquid sample.

### **In situ liquid SIMS experiment**

ToF-SIMS V spectrometer (IONTOF GmbH, Münster, Germany) was employed for *in situ* liquid SIMS analysis of SWILs. In this study, a 25 keV Bi<sub>3</sub><sup>+</sup> cluster ion beam was applied as the primary ion beam. During the measurement, the Bi<sub>3</sub><sup>+</sup> beam made an aperture with 2 μm in diameter. The pulse width of ~180 ns was used for sputtering through the SiN membrane. After punch-through, the ion beam bombarded on the sample surface for about 200 s and then the pulse width was changed to 80 ns to obtain better mass resolution. The maximum chamber pressure during analysis was 8.4×10<sup>-7</sup> mbar, indicating that there was no spraying or fast spreading of aqueous solutions from the aperture occurred.<sup>3</sup> Before SIMS analysis, a 1 KeV O<sub>2</sub><sup>+</sup> beam was scanned on the SiN window for ~20 s to remove surface contamination. Also, an electron flood gun was used to compensate surface charging during all measurements. A total measurement time is 400 s after punch-through. The raster resolution was 64 × 64 pixels. The same instrument settings were applied to all the samples measurement. The mass resolution was approximately 500 in the positive mode and 370 in the negative mode, based on the half peak width of the peak Si<sup>+</sup> (m/z<sup>+</sup> 28) and CN<sup>-</sup> (m/z<sup>-</sup> 26), respectively.

### **Data analysis**

Details analysis of raw data can be found in our previous work.<sup>1</sup> In general, the XAFS software package of Athena is used to process the collected spectra and to remove the background. Data fitting was performed using FEFF9 code and Artemis.<sup>4,6</sup> Iron oxide (Fe<sub>2</sub>O<sub>3</sub>, Alfa Aesar, 99.995%) was used as a reference to calibrate the possible energy shift ( $\Delta E_0$ ).

### **FEFF simulation**

To generate an EXAFS spectrum of DFT optimized structures, firstly, all the atom positions and coordination numbers were adopted from the simulated structure. These coordinates were used as the primary input for the ab initio EXAFS scattering code (FEFF9) that includes all the single- and multiple-scattering paths out to 6 Å.<sup>7-8</sup> Next, an approximate treatment of the bond disorder at 300 K is applied by setting a universal value of Debye–Waller Factor (DWF) of all paths to 0.0035. The obtained spectra for each Fe atom in the cluster are then averaged, and an overall E<sup>0</sup> is applied

to match experimental values (oscillations in  $\chi(k)$  converge at  $k = 0$ ). While the global DWF is a good estimate of the first shell disorder, it is an overestimation of the order in the higher shells which manifests as an over-prediction of these amplitudes, although the atom positions predicted by the theory are correctly represented.

### DFT calculation

Density functional theory calculations were performed with the CP2K package<sup>9</sup>, using the PBE-D3 density functional<sup>10-11</sup>. The Gaussian plane wave hybrid basis set scheme was employed<sup>12</sup>, in which the DZVP Gaussian basis sets<sup>13</sup> in conjunction with an energy cutoff of 420 Ry were used. Spin-polarization together with different starting spin configurations were considered in the calculations. In systems of molecules bonded to Fe, the binding energy per molecule is computed as

$$\Delta E_b = (E(Fe - n Mol) - E(Fe) - n E(Mol))/n$$

Where  $E(Fe - n Mol)$  is the energy of the bound system,  $E(Fe)$  is the energy of an iron atom, and  $E(Mol)$  is the energy of one molecule, and  $n$  is the number of molecules binding to the Fe site.

### Supplemental Figures

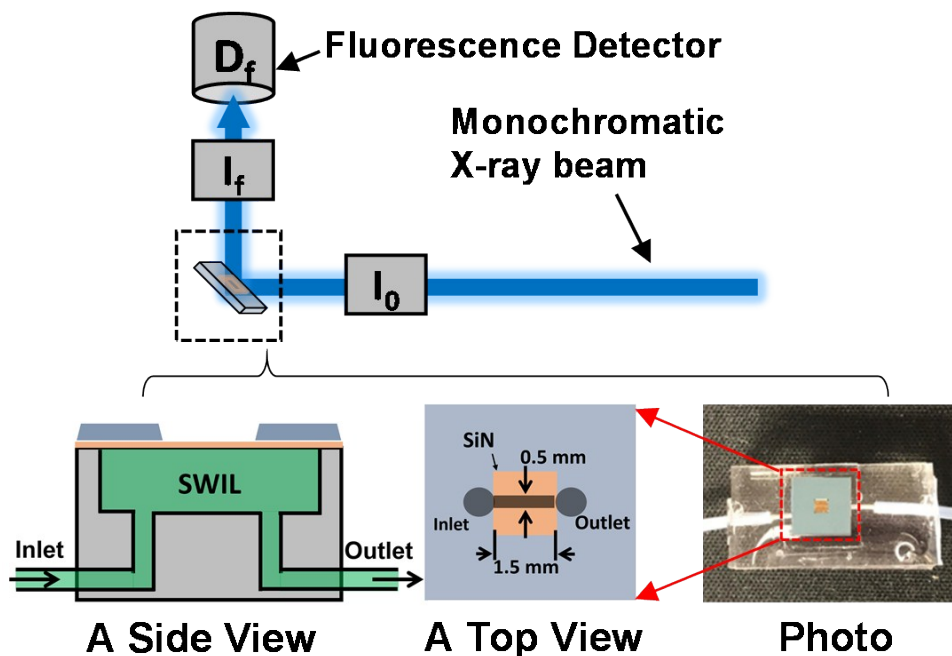

**Figure S1.** The schematic showing the top and side view of the SALVI cell in relation to the overall beamline setup; and a photo of the SALVI device is also shown.<sup>4</sup>

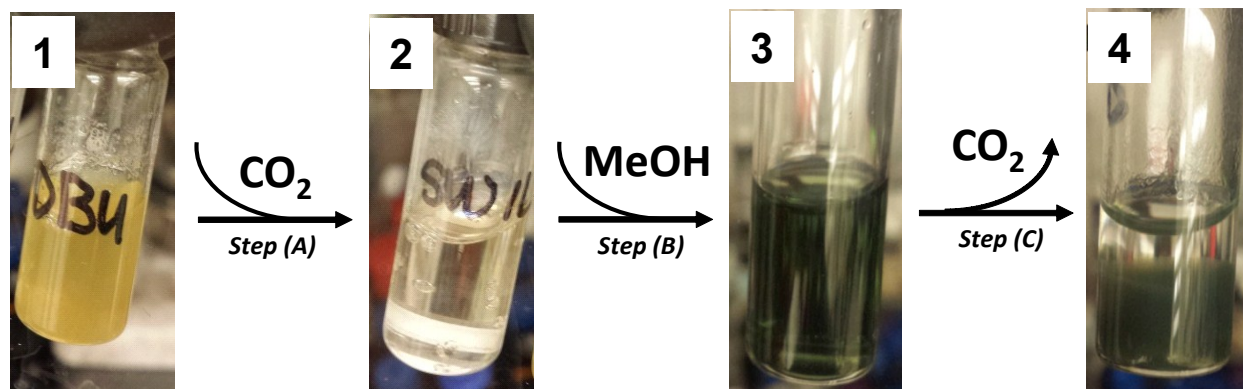

**Figure S2.** SWIL sample preparation and relationship to each other: (1)  $\text{Fe}(\text{OAc})_2$  dissolved in DBU and 1-hexanol (light brown solution); (2)  $\text{CO}_2$  added to solution 1 to form ionic liquid (colorless solution); (3) methanol added to 2 to form carbonate green rust solution; and (4)  $\text{CO}_2$  removed to form green rust suspension/precipitation



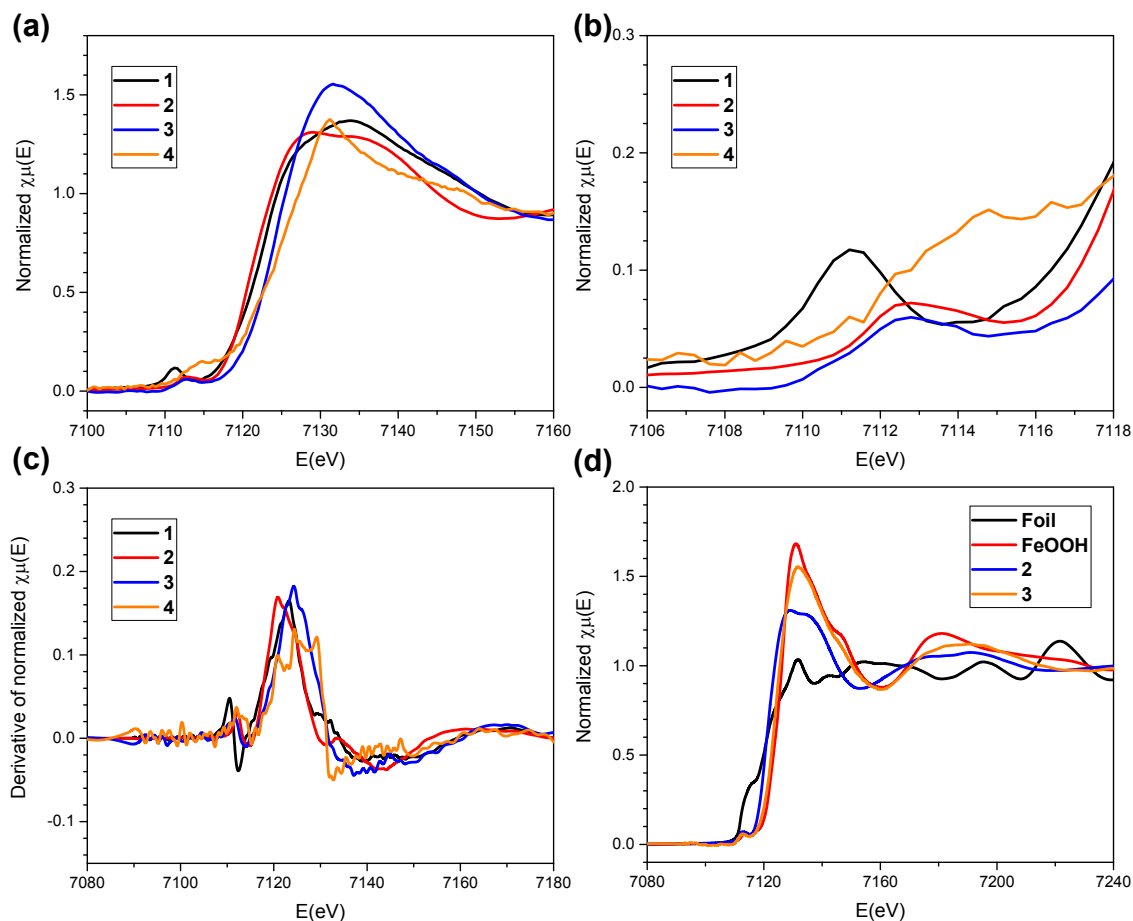

**Figure S3.** (a) Normalized and (c) first derivative spectra of Fe-XANES of the as-prepared 1, 2, 3, and 4. (b) The pre-edge feature at 7106–7118 eV, corresponding to the  $1s \rightarrow 3d$  electronic transition for Fe. (d) XANES spectra comparison of Fe foil and FeOOH (Lepidocrocite) references with 2 and 3.

It needs to note that, for the XANES spectra of 4, during  $\text{CO}_2$  removal, the solvated iron complex in green solution 3 started to precipitate and settled to the bottom of the cell, which led to poor signal to noise ratio (less iron species in the solution to absorb photons); Secondly, the spectra collected in this step give only averaged information of solution 3 and following formed GR suspended in the liquid.

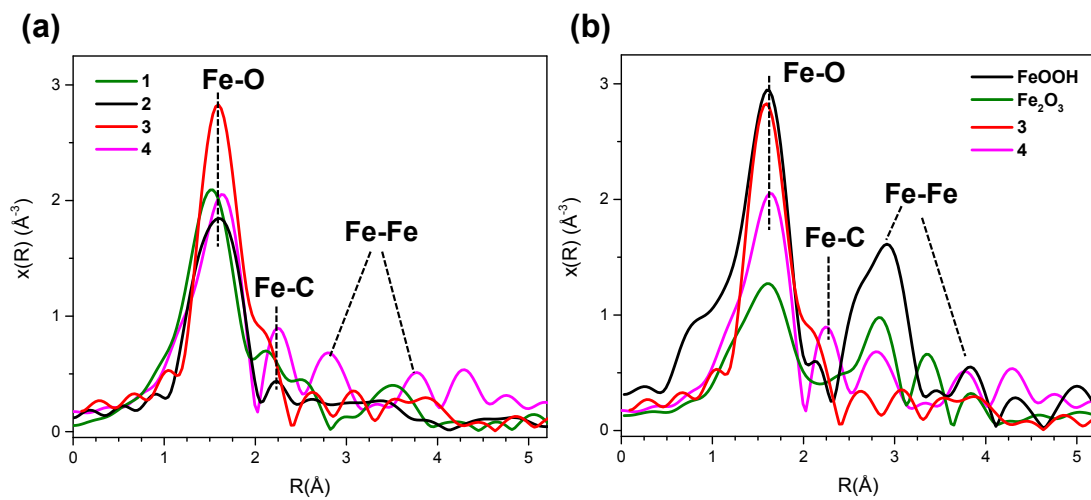

**Figure S4.** The  $k^2$ -weighted Fe-EXAFS  $\chi(R)$  spectra of the as-prepared 1, 2, 3, 4, and  $\text{Fe}_2\text{O}_3$  and FeOOH (Lepidocrocite) references.

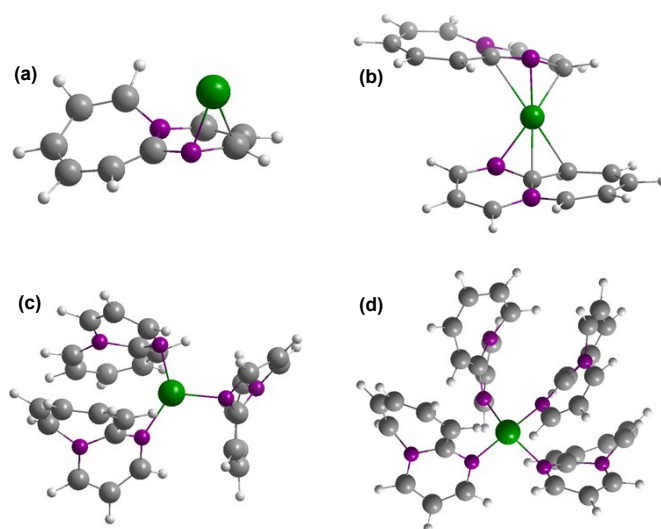

**Figure S5.** Considered structures of  $(\text{DBU})_n\text{-Fe}$  systems,  $n = 1, 2, 3,$  and  $4$ . Green, purple, grey and white spheres represent Fe, N, C and H atoms, respectively.

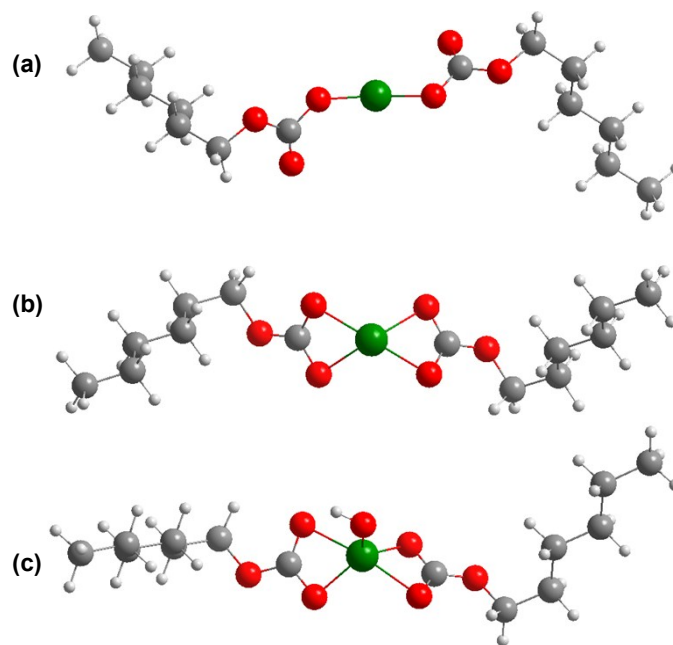

**Figure S6.** Possible structures of the Fe-hexylcarbonate cluster in the ionic solution: Fe in Sol-(a), Sol-(b), and Sol-(c) is 2, 4, and 5 coordinated. Green, red, grey and white spheres represent Fe, O, C and H atoms, respectively.

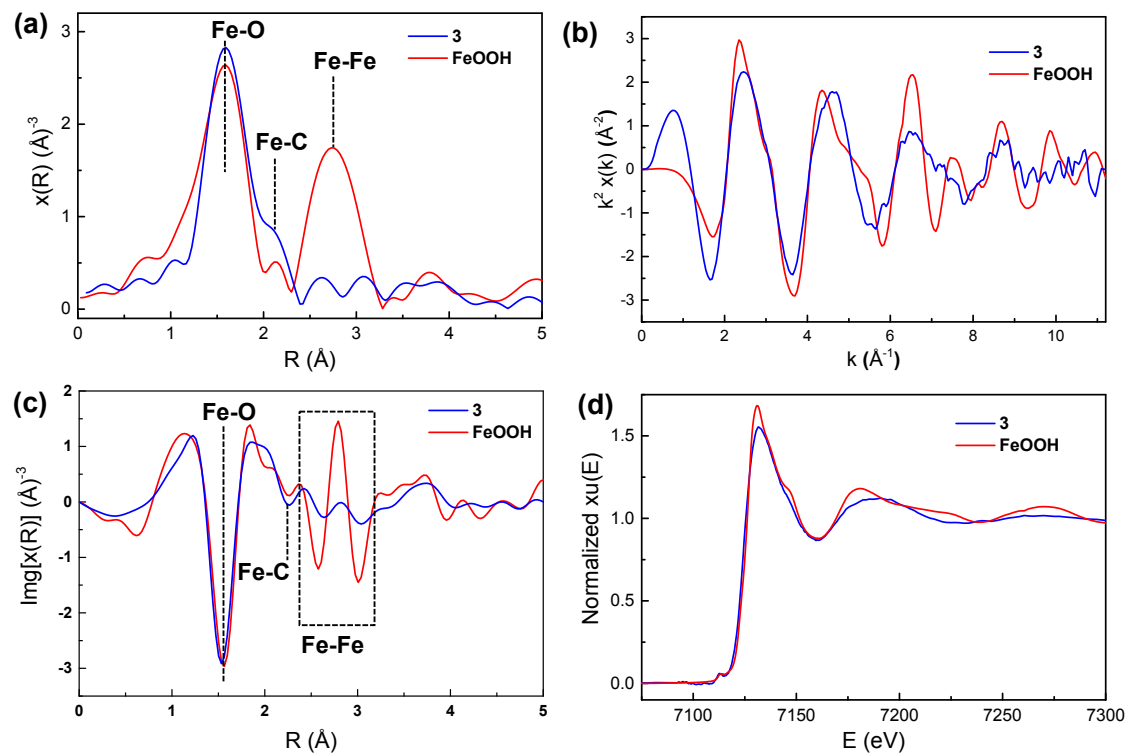

**Figure S7.** Comparison of Fe k-edge EXAFS (a) Mag  $\chi(R)$ , (b)  $\chi(k)$  and (c)  $\text{Im} \chi(R)$  spectra and (d) XANES spectra for solution **3** and FeOOH (Lepidocrocite) reference.

The intensive feature at  $\sim 1.5$  Å is assigned to the first shell Fe-O path. A weak bump appeared at 2.2 Å might be a Fe-C signal. The peak for Fe-Fe scattering centers at  $\sim 2.6$  Å. However, this peak is very weak in **3** (a and c. blue curves).

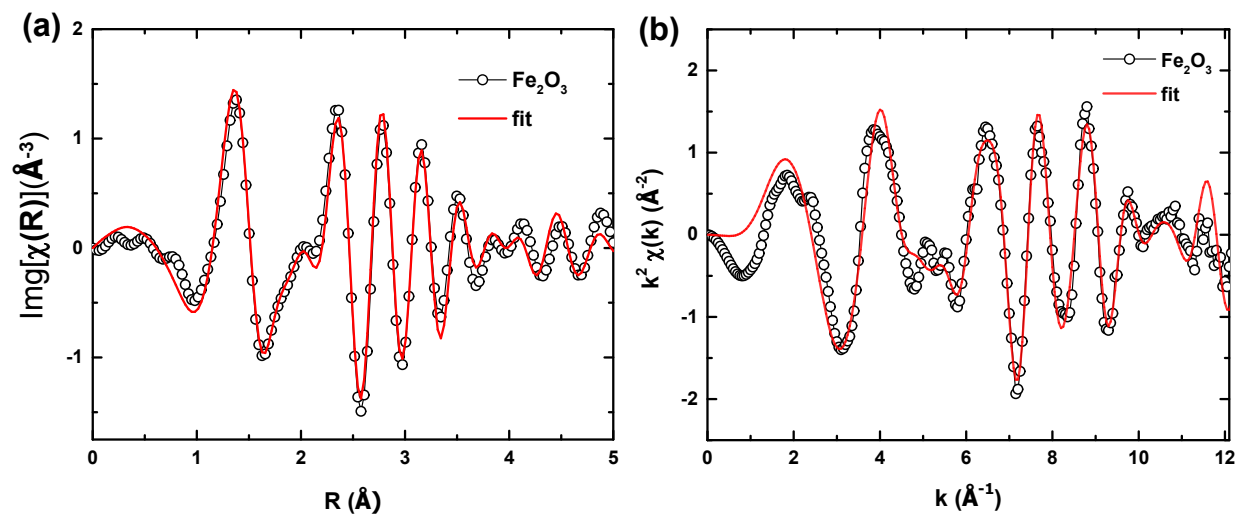

**Figure S8.**  $k^2$ -weighted Fe K-edge (a)  $\text{Im}[\chi(R)]$  and (b)  $\chi(k)$  spectra of  $\text{Fe}_2\text{O}_3$  reference and the obtained FEFF fits.

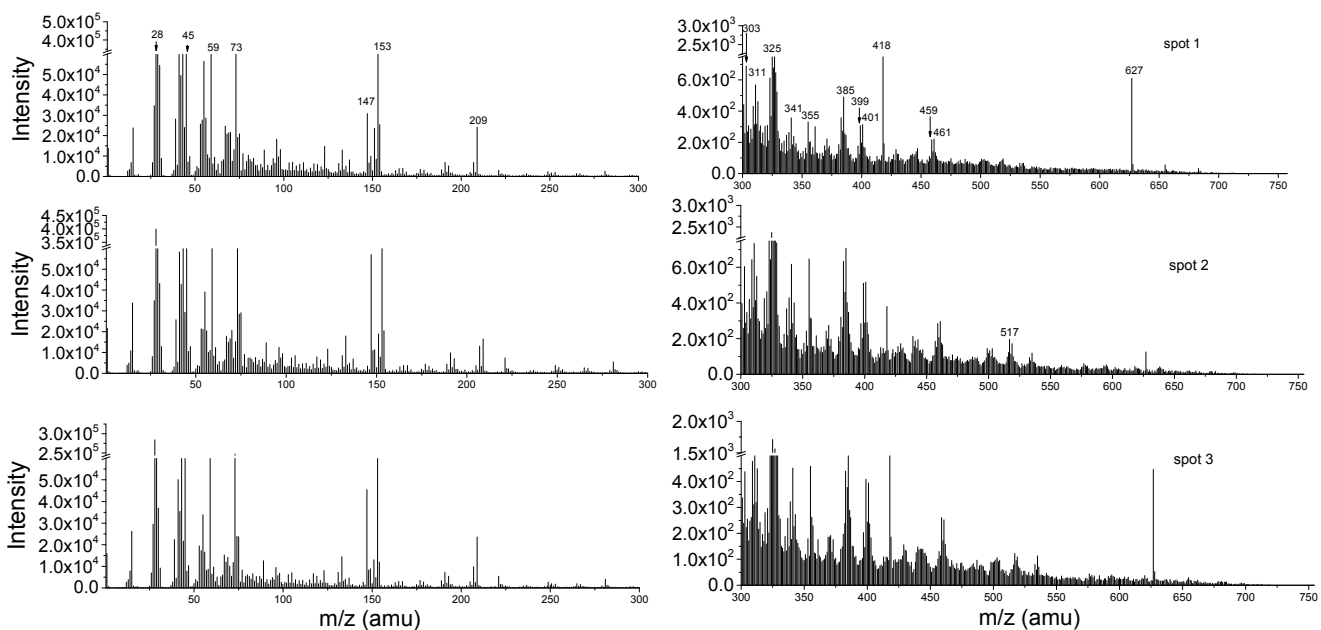

**Figure S9.** In situ liquid ToF-SIMS spectral analysis of the green rust in DBU and hexanol SWIL in the positive ion mode.

Three replicates were shown to confirm data reproducibility.

## Supplemental Tables

**Table S1.** The Fe-N bonding distance, and the binding energy per molecule.

|                        | $d_{\text{FeN}}$ (Å) | $\delta E_b$ (eV) |
|------------------------|----------------------|-------------------|
| (DBU) <sub>1</sub> -Fe | 2.1                  | -1.13             |
| (DBU) <sub>2</sub> -Fe | 1.9                  | -1.87             |
| (DBU) <sub>3</sub> -Fe | 2.0                  | -1.56             |
| (DBU) <sub>4</sub> -Fe | 2.0                  | -1.49             |

Based on [Figure S4](#) and [Table S1](#), it appears that in the case of (DBU)<sub>2</sub>-Fe the FeN bond is shortest (1.9 Å) and the binding energy (per molecule) is highest (-1.87 eV), and in the case of (DBU)<sub>1</sub>-Fe the FeN bond is longest (2.1 Å) and the binding energy is lowest (-1.13 eV). In the (DBU)<sub>3</sub>-Fe and (DBU)<sub>4</sub>-Fe systems, the Fe-N bond is 2.0 Å, while the binding energy is -1.56 and -1.49 eV respectively.



**Table S2.** The Fe-O bonding distance, and the relative energy to Sol-(b).

|                                    | $d_{\text{FeO}}$ (Å) | Relative E (eV) |
|------------------------------------|----------------------|-----------------|
| Sol-(a)                            | 1.8                  | 0.65            |
| Sol-(b)                            | 2.0                  | 0               |
| Sol-(c)                            | 2.1 (1.8)            |                 |
| * The distance of additional Fe-OH |                      |                 |

The structure of Sol-(a) is 0.65 eV less stable than that of Sol-(b). The Fe-O bond length clearly changes from one structure to another. In Sol-(b), there are 4 oxygen atoms of hexanol bonded to Fe, the Fe-O bond is 2.0 Å which is considerably longer than the one in the structure with 2 oxygen atoms of hexanol bonded to Fe in Sol-(a), 1.8 Å. When one more OH group is attached to the Fe site in Sol-(c), the Fe-O (O of hexanol) becomes longer, 2.1 Å. The Fe-OH distance in this case is just 1.8 Å.

**Table S3.** The parameters determined by fitting the experimental spectrum of Fe<sub>2</sub>O<sub>3</sub>. Other parameters: amplitude reduction factor (amp)  $S_0^2 = 0.84 \pm 0.2$ , R-factor = 0.01, and  $E_0 = -2.3$ .

| Shell              | CN | Distance (Å)  | DWF            |
|--------------------|----|---------------|----------------|
| Fe-O <sub>1</sub>  | 3  | 1.914 ± 0.036 | 0.0024± 0.0008 |
| Fe-O <sub>2</sub>  | 3  | 2.070 ± 0.043 | 0.0033±0.0010  |
| Fe-Fe <sub>1</sub> | 3  | 2.949 ± 0.019 | 0.0063±0.0029  |
| Fe-Fe <sub>2</sub> | 3  | 3.380 ± 0.024 | 0.0066±0.0030  |
| Fe-Fe <sub>3</sub> | 6  | 3.678 ± 0.024 | 0.0089±0.0035  |
| Fe-Fe <sub>4</sub> | 6  | 5.000 ± 0.033 | 0.0116±0.0052  |

Standard Fe<sub>2</sub>O<sub>3</sub> is fitted to determine the necessary paths and fitting parameters that are then used to analyze the Fe spectra of the solutions. Therefore, during the fit of Fe samples, we fixed the value of reduction factor ( $S_0^2 = 0.84$ ) for the fits of samples.

**Table S4.** Cartesian coordinates

XYZ coordinates for all DFT-optimized structures.

|                                                               |               |               |               |                        |               |               |               |
|---------------------------------------------------------------|---------------|---------------|---------------|------------------------|---------------|---------------|---------------|
| (DBU) molecule                                                |               |               | H             | 8.3826819817           | 6.4848560725  | 9.5965903500  |               |
| C                                                             | 6.3303719936  | 8.9477050060  | 8.8799372030  | Fe                     | 11.0276382976 | 8.7006548309  | 11.5528864555 |
| C                                                             | 6.9685007502  | 7.7354514302  | 8.9048938954  | (DBU) <sub>2</sub> -Fe |               |               |               |
| C                                                             | 6.8522012324  | 10.1368195212 | 9.5170003227  | C                      | 6.8698983984  | 7.6328349100  | 9.4864194384  |
| C                                                             | 8.1481367046  | 10.4289686934 | 9.7339091120  | C                      | 7.6233407538  | 6.6796727429  | 10.1597556856 |
| C                                                             | 8.2855988636  | 7.4226643992  | 9.3745767315  | C                      | 7.3284694338  | 8.9090613592  | 9.0579312950  |
| C                                                             | 9.3651156759  | 8.2702768364  | 9.4509169732  | C                      | 8.5856135025  | 9.4501442733  | 9.1028588347  |
| N                                                             | 9.2337108793  | 9.6644286270  | 9.1486797857  | C                      | 8.9707551444  | 6.7526675265  | 10.5485786648 |
| N                                                             | 10.6367938995 | 7.8026901350  | 9.7468839267  | C                      | 9.9911644296  | 7.7035793430  | 10.2877807999 |
| C                                                             | 10.2984826317 | 10.3189640143 | 8.6201973237  | N                      | 9.8115673787  | 8.9193129656  | 9.5238486852  |
| C                                                             | 11.5282336001 | 9.7044643432  | 8.5322770854  | N                      | 11.1803007018 | 7.5110935708  | 10.9511421817 |
| C                                                             | 11.6521867401 | 8.4839274245  | 9.2604642782  | C                      | 10.9690847015 | 9.6143003902  | 9.1426307464  |
| H                                                             | 12.3842019155 | 10.2133633744 | 8.1023059088  | C                      | 12.2074216190 | 9.2415111913  | 9.5496358345  |
| H                                                             | 12.6470526787 | 8.0980558206  | 9.4960832253  | C                      | 12.3449440606 | 8.1317292086  | 10.4697447740 |
| H                                                             | 10.1217737169 | 11.3610170135 | 8.3571151798  | H                      | 13.0815375620 | 9.7774080952  | 9.1910177003  |
| H                                                             | 8.4642894707  | 11.2317931614 | 10.3958254326 | H                      | 13.1994646594 | 8.0837539426  | 11.1446424370 |
| H                                                             | 6.1276234111  | 10.8288077076 | 9.9533965940  | H                      | 10.7960206649 | 10.4500124910 | 8.4722042007  |
| H                                                             | 5.3072566700  | 8.9863350816  | 8.5111196609  | H                      | 8.7094975749  | 10.4604000501 | 8.7193049316  |
| H                                                             | 6.3920506656  | 6.8759493920  | 8.5565620560  | H                      | 6.5826592808  | 9.5800850922  | 8.6327538768  |
| H                                                             | 8.5199569023  | 6.3824168347  | 9.5916270978  | H                      | 5.8215148683  | 7.4048820805  | 9.3014784114  |
|                                                               |               |               |               | H                      | 7.1061998644  | 5.7709330445  | 10.4665622782 |
|                                                               |               |               |               | H                      | 9.3461347390  | 5.9406805139  | 11.1699080864 |
| C <sub>6</sub> H <sub>12</sub> OCO <sub>2</sub> <sup>2-</sup> |               |               |               | Fe                     | 11.8554647782 | 6.3713161804  | 9.6000281790  |
| C                                                             | 7.3215984274  | 6.1086461125  | 10.9988243949 | C                      | 15.3549086781 | 4.4449873871  | 10.0497096271 |
| H                                                             | 7.5949748155  | 5.6262197725  | 11.9475144231 | C                      | 14.8344095719 | 5.4344164573  | 9.2681417815  |
| H                                                             | 6.2771718955  | 6.4382569772  | 11.0860366593 | C                      | 14.7233121025 | 3.2067000083  | 10.4180707827 |
| H                                                             | 7.3525013218  | 5.3377309065  | 10.2166084964 | C                      | 13.5190555571 | 2.6695405991  | 10.0580846457 |
| C                                                             | 8.2526792385  | 7.2823667844  | 10.6632680789 | C                      | 13.5147652337 | 5.4894400801  | 8.6663836759  |
| H                                                             | 8.2306571079  | 8.0224133216  | 11.4760865416 | C                      | 12.4530463630 | 4.5204376172  | 8.7225128449  |
| H                                                             | 9.2940213780  | 6.9329485420  | 10.6150732506 | N                      | 12.5153260385 | 3.1658366403  | 9.2210261539  |
| C                                                             | 7.8881389838  | 7.9706414294  | 9.3388778866  | N                      | 11.2547885257 | 5.0203152583  | 8.2886588178  |
| H                                                             | 6.8460130753  | 8.3210996205  | 9.3824778356  | C                      | 11.4244254460 | 2.3503497762  | 8.9024067002  |
| H                                                             | 7.9122746909  | 7.2308349618  | 8.5247643605  | C                      | 10.2522237608 | 2.8589068087  | 8.3817074048  |
| C                                                             | 8.8164498819  | 9.1428846367  | 8.9923604939  | C                      | 10.1469417995 | 4.2336597380  | 8.1335461824  |
| H                                                             | 9.8560902409  | 8.7881332233  | 8.9499034998  | H                      | 9.4283523140  | 2.1831114913  | 8.1691756805  |
| C                                                             | 8.4571521859  | 9.8106449201  | 7.6579550838  | H                      | 9.2375618473  | 4.7313806961  | 7.8133537540  |
| C                                                             | 9.3796118559  | 10.9648096564 | 7.2911312493  | H                      | 11.5638427831 | 1.2960769992  | 9.1190567588  |
| O                                                             | 10.7266175876 | 10.4258957493 | 7.0488022772  | H                      | 13.2461200145 | 1.7019838018  | 10.4725334766 |
| C                                                             | 11.8049031210 | 10.8344273760 | 7.7354478989  | H                      | 15.2855891984 | 2.5716820944  | 11.1022963892 |
| O                                                             | 12.9054611002 | 10.3476001658 | 7.5744019618  | H                      | 16.3573374206 | 4.5986291703  | 10.4468457959 |
| O                                                             | 11.5445899989 | 11.8503251919 | 8.6252543309  | H                      | 15.4551021006 | 6.3075591348  | 9.0711548854  |
| H                                                             | 8.7896403507  | 9.8932470110  | 9.7965680054  | H                      | 13.4260687579 | 6.1383737130  | 7.7868646496  |
| H                                                             | 8.4705883667  | 9.0674502930  | 6.8480401825  | (DBU) <sub>3</sub> -Fe |               |               |               |
| H                                                             | 7.4288246815  | 10.2046867914 | 7.6943475518  | Fe                     | 10.9459402511 | 5.6552272371  | 8.6323493402  |
| H                                                             | 9.4172419728  | 11.7261630305 | 8.0756253817  | C                      | 7.3470735485  | 4.1369001324  | 9.3380826160  |
| H                                                             | 9.0835159521  | 11.4400281208 | 6.3469424338  | C                      | 8.0269952439  | 4.5038585593  | 8.1938458909  |
| H                                                             | 12.4065233587 | 12.0304517104 | 9.0461384242  | C                      | 7.2031083159  | 4.9142486344  | 10.5268021385 |
| (DBU) <sub>1</sub> -Fe                                        |               |               |               | C                      | 7.6489932849  | 6.1697233858  | 10.8525851781 |
| C                                                             | 6.1131546899  | 8.9038911676  | 8.6846181337  | C                      | 8.8231252265  | 5.6724209425  | 7.9622503784  |
| C                                                             | 6.7875197660  | 7.7174402003  | 8.8277616994  | C                      | 9.1783907996  | 6.6996052117  | 8.8981917899  |
| C                                                             | 6.6285235116  | 10.1874207310 | 9.0812248642  | N                      | 8.4284414424  | 7.0633785143  | 10.0942040419 |
| C                                                             | 7.9227664148  | 10.5443749152 | 9.2624892936  | N                      | 10.2453931251 | 7.5225408547  | 8.5735187476  |
| C                                                             | 8.1182391175  | 7.4981953539  | 9.3008725979  | C                      | 8.4795534215  | 8.3941036966  | 10.4406685974 |
| C                                                             | 9.1799063219  | 8.3759739184  | 9.3589577819  | C                      | 9.4142397850  | 9.2772318295  | 9.9288802980  |
| N                                                             | 9.0685238560  | 9.7524498536  | 8.9219468060  | C                      | 10.3979525189 | 8.7472032645  | 9.0814932847  |
| N                                                             | 10.4083172338 | 7.9396480666  | 9.8152745834  | H                      | 9.4185668495  | 10.3150537458 | 10.2485185729 |
| C                                                             | 10.2032044316 | 10.4077839792 | 8.5092785811  | H                      | 11.3357169825 | 9.2507457387  | 8.8625716411  |
| C                                                             | 11.4539108420 | 9.8909458732  | 8.7348357722  | H                      | 7.7525687064  | 8.7058016990  | 11.1841490776 |
| C                                                             | 11.5484980849 | 8.6941616382  | 9.5156686208  | H                      | 7.3703274766  | 6.6004375974  | 11.8170596864 |
| H                                                             | 12.3416993928 | 10.3987474867 | 8.3718545378  | H                      | 6.6169340211  | 4.4568837817  | 11.3238742749 |
| H                                                             | 12.4920350713 | 8.1427428270  | 9.5529854847  | H                      | 6.8322742961  | 3.1778025020  | 9.3311294807  |
| H                                                             | 10.0328498481 | 11.3743486016 | 8.0402179714  | H                      | 7.9907307784  | 3.8075861904  | 7.3558352261  |
| H                                                             | 8.1729949251  | 11.5131283265 | 9.6884513305  | H                      | 9.1160380112  | 5.8850230703  | 6.9085294314  |
| H                                                             | 5.8981390689  | 10.9595216776 | 9.3307307315  | C                      | 11.3833531630 | 7.8242485315  | 13.4359739225 |
| H                                                             | 5.0758158283  | 8.8670875198  | 8.3569319594  | C                      | 12.2039230616 | 7.6660147851  | 12.3485208625 |
| H                                                             | 6.2291078819  | 6.8080942336  | 8.5999800245  | C                      | 10.1860758288 | 7.0558297926  | 13.7073101264 |
|                                                               |               |               |               | C                      | 9.9118963985  | 5.8042913382  | 13.2675549251 |
|                                                               |               |               |               | C                      | 12.0924780557 | 6.7031113029  | 11.2933272598 |

|                        |               |               |               |         |               |               |               |
|------------------------|---------------|---------------|---------------|---------|---------------|---------------|---------------|
| C                      | 11.4415796071 | 5.5029993612  | 11.3503570194 | H       | 5.8425440750  | 5.7190838164  | 11.6157421627 |
| N                      | 10.8670779175 | 5.0097392087  | 12.5541567709 | H       | 6.2996817503  | 3.4840024484  | 10.6762570584 |
| N                      | 11.3956267021 | 4.6380868236  | 10.2421364628 | H       | 8.3953847009  | 2.9457679694  | 9.6929361250  |
| C                      | 11.0811780910 | 3.6744542017  | 12.8381454469 | H       | 10.1961053498 | 4.4250284470  | 9.2798650779  |
| C                      | 11.5512506288 | 2.8357527234  | 11.8441074612 | C       | 10.3395029592 | 7.7783928609  | 13.7342198906 |
| C                      | 11.5743364853 | 3.3255022412  | 10.5166392954 | C       | 11.4705308708 | 8.0641108707  | 13.0179909793 |
| H                      | 11.8188321697 | 1.8067865711  | 12.0689037106 | C       | 9.4131501250  | 6.7247806254  | 13.3975607093 |
| H                      | 11.6551850684 | 2.6636957264  | 9.6573336797  | C       | 9.6817421877  | 5.5921690493  | 12.7145948044 |
| H                      | 10.8272293110 | 3.3601494521  | 13.8500229593 | C       | 12.0130640059 | 7.3539456943  | 11.8958766318 |
| H                      | 8.9452781068  | 5.3306659654  | 13.4320190860 | C       | 11.8224985605 | 6.0438358046  | 11.5646623764 |
| H                      | 9.4073715845  | 7.5371820590  | 14.3028120924 | N       | 11.0179678141 | 5.1741235440  | 12.3735447571 |
| H                      | 11.6003864316 | 8.6475179578  | 14.1154045058 | N       | 12.4440495726 | 5.4500974190  | 10.4487142791 |
| H                      | 13.0220659575 | 8.3809032281  | 12.2394652274 | C       | 11.3519212298 | 3.8582714984  | 12.4508209158 |
| H                      | 12.6122623817 | 6.9077312542  | 10.3608655544 | C       | 12.3436701233 | 3.3393402786  | 11.6349770586 |
| C                      | 10.8929981631 | 1.3022574861  | 6.0826894357  | C       | 12.7917842989 | 4.1530322802  | 10.5791336737 |
| C                      | 12.041909482  | 1.7121963397  | 6.7083106945  | H       | 12.6506538956 | 2.3023757471  | 11.7173435295 |
| C                      | 9.8752409316  | 2.1508496629  | 5.5295645952  | H       | 13.3920554145 | 3.7417469396  | 9.7705628789  |
| C                      | 9.9810649740  | 3.4469139402  | 5.1474888257  | H       | 10.7500055793 | 3.2588606869  | 13.1298665696 |
| C                      | 12.4206605951 | 3.0573204086  | 7.0312079456  | H       | 8.8953947663  | 4.9392383276  | 12.3425362023 |
| C                      | 11.9097726450 | 4.2123428623  | 6.4940332827  | H       | 8.3612167665  | 6.8855055000  | 13.6430202679 |
| N                      | 11.1698290267 | 4.2073963898  | 5.2422068807  | H       | 10.0422436375 | 8.4691281851  | 14.5217228771 |
| N                      | 12.1458108952 | 5.4696367413  | 7.0410235455  | H       | 12.0107182454 | 8.9756683794  | 13.2790159318 |
| C                      | 11.4530086569 | 5.2150476947  | 4.3628727551  | H       | 12.7049971573 | 7.8971088388  | 11.2554581319 |
| C                      | 12.1833490803 | 6.3223701937  | 4.7814624006  | C       | 10.0511600600 | 1.1437764101  | 7.0283133588  |
| C                      | 12.3922112960 | 6.4784761081  | 6.1628497285  | C       | 11.3245837770 | 1.5921785621  | 7.2704177329  |
| H                      | 12.4535248938 | 7.1092923908  | 4.0785209152  | C       | 8.9048742199  | 1.9928615444  | 6.8286775740  |
| H                      | 12.6502851645 | 7.4403691600  | 6.5961464714  | C       | 8.9002621047  | 3.2845897691  | 6.4226913193  |
| H                      | 11.0018886391 | 5.1333486467  | 3.3766920296  | C       | 11.8051454002 | 2.9424524567  | 7.2950657093  |
| H                      | 9.1224489658  | 3.9829829902  | 4.7538775431  | C       | 11.2475196300 | 4.0560852592  | 6.7217830852  |
| H                      | 8.8874917092  | 1.7153693317  | 5.3870290331  | N       | 10.0524059408 | 3.9786210249  | 5.9243123624  |
| H                      | 10.6922077363 | 0.2333700145  | 6.0448639105  | N       | 11.8441023796 | 5.3117964388  | 6.8342789362  |
| H                      | 12.7024415570 | 0.9347066460  | 7.0909971528  | C       | 9.9072431607  | 4.8659178715  | 4.8919741020  |
| H                      | 13.1497446021 | 3.2051745393  | 7.8262659378  | C       | 10.7743920055 | 5.9333313700  | 4.7530972068  |
|                        |               |               |               | C       | 11.6743777615 | 6.1792766276  | 5.8061093955  |
|                        |               |               |               | H       | 10.6868181893 | 6.6162607912  | 3.9146631183  |
|                        |               |               |               | H       | 12.2497163711 | 7.1016020129  | 5.8637220556  |
|                        |               |               |               | H       | 9.0484640498  | 4.6974359774  | 4.2471622992  |
|                        |               |               |               | H       | 7.9946475486  | 3.8858770624  | 6.4572150694  |
|                        |               |               |               | H       | 7.9298424968  | 1.5876323839  | 7.1066697102  |
|                        |               |               |               | H       | 9.8652379917  | 0.0738887024  | 7.1071525403  |
|                        |               |               |               | H       | 12.0693612268 | 0.8368020451  | 7.5247264508  |
|                        |               |               |               | H       | 12.7641816567 | 3.1249307994  | 7.7756470851  |
|                        |               |               |               | Sol-(a) |               |               |               |
|                        |               |               |               | C       | 6.4726942803  | 6.9126364303  | 11.0477594266 |
|                        |               |               |               | H       | 6.5842698688  | 6.4035910117  | 12.0152147740 |
|                        |               |               |               | H       | 5.5685051963  | 7.5342652282  | 11.1054403193 |
|                        |               |               |               | H       | 6.2850943213  | 6.1400344101  | 10.2892904074 |
|                        |               |               |               | C       | 7.7086629993  | 7.7535827439  | 10.6959835496 |
|                        |               |               |               | H       | 7.8910152133  | 8.4991047087  | 11.4834274494 |
|                        |               |               |               | H       | 8.6047895679  | 7.1164317480  | 10.6854025154 |
|                        |               |               |               | C       | 7.5782722887  | 8.4674547902  | 9.3414176382  |
|                        |               |               |               | H       | 6.6821083281  | 9.1059721125  | 9.3497847669  |
|                        |               |               |               | H       | 7.3960369755  | 7.7222128440  | 8.5523816621  |
|                        |               |               |               | C       | 8.8107229073  | 9.3084589477  | 8.9792430760  |
|                        |               |               |               | H       | 9.7046962016  | 8.6688606030  | 8.9736164523  |
|                        |               |               |               | C       | 8.6775589153  | 10.0010055439 | 7.6155690850  |
|                        |               |               |               | C       | 9.8870577581  | 10.8476033900 | 7.2410577573  |
|                        |               |               |               | O       | 11.0492370431 | 9.9751850687  | 7.0533185967  |
|                        |               |               |               | C       | 12.1201687646 | 10.2090217299 | 7.8558019412  |
|                        |               |               |               | O       | 13.0633420790 | 9.2949333858  | 7.5733791455  |
|                        |               |               |               | O       | 12.2153483628 | 11.0926558227 | 8.6958081151  |
|                        |               |               |               | H       | 8.9928510350  | 10.0642290757 | 9.7574247704  |
|                        |               |               |               | H       | 8.4990448524  | 9.2541892011  | 6.8286681112  |
|                        |               |               |               | H       | 7.7967271107  | 10.6630945626 | 7.6123628515  |
|                        |               |               |               | H       | 10.1283572486 | 11.5905164610 | 8.0101851962  |
|                        |               |               |               | H       | 9.7433097717  | 11.3581514755 | 6.2800241955  |
|                        |               |               |               | C       | 23.4337441637 | 11.7804583975 | 10.8646458900 |
|                        |               |               |               | H       | 23.3478817187 | 12.3865574528 | 11.7772495748 |
|                        |               |               |               | H       | 24.2949420638 | 11.1105263363 | 10.9943050306 |
| (DBU) <sub>4</sub> -Fe |               |               |               |         |               |               |               |
| C                      | 14.5129327170 | 10.4896878433 | 11.3367573701 |         |               |               |               |
| C                      | 13.6518207684 | 10.4577981883 | 10.2700115679 |         |               |               |               |
| C                      | 15.2998917761 | 9.3723020137  | 11.7943146463 |         |               |               |               |
| C                      | 15.6946670469 | 8.2993655157  | 11.0668404510 |         |               |               |               |
| C                      | 13.3969324110 | 9.3712760781  | 9.3684127370  |         |               |               |               |
| C                      | 14.2033575764 | 8.2980924245  | 9.0883608332  |         |               |               |               |
| N                      | 15.5238671147 | 8.1805410998  | 9.6511252493  |         |               |               |               |
| N                      | 13.7991882163 | 7.2826063753  | 8.2208676575  |         |               |               |               |
| C                      | 16.4878641761 | 7.5421522260  | 8.9064435297  |         |               |               |               |
| C                      | 16.1377163824 | 6.8261565778  | 7.7776475748  |         |               |               |               |
| C                      | 14.7687561428 | 6.6348014187  | 7.5186242820  |         |               |               |               |
| H                      | 16.8960298323 | 6.3441673427  | 7.1689467375  |         |               |               |               |
| H                      | 14.4171625488 | 5.9130379449  | 6.7845715710  |         |               |               |               |
| H                      | 17.4986129215 | 7.5966783805  | 9.3021461652  |         |               |               |               |
| H                      | 16.1725434754 | 7.4431148313  | 11.5387323059 |         |               |               |               |
| H                      | 15.5588021115 | 9.3451451760  | 12.8543751101 |         |               |               |               |
| H                      | 14.5241014947 | 11.3863382917 | 11.9547267677 |         |               |               |               |
| H                      | 13.0286842753 | 11.3396761139 | 10.1149192224 |         |               |               |               |
| H                      | 12.4543208676 | 9.3874789104  | 8.8239059005  |         |               |               |               |
| Fe                     | 12.1563611507 | 6.2262271725  | 8.6246284664  |         |               |               |               |
| C                      | 6.9522273293  | 4.3082766728  | 10.3932444530 |         |               |               |               |
| C                      | 8.1650824959  | 4.0040398062  | 9.8261988025  |         |               |               |               |
| C                      | 6.5484785165  | 5.6341091275  | 10.7868224247 |         |               |               |               |
| C                      | 7.0273959419  | 6.8031435727  | 10.3002381566 |         |               |               |               |
| C                      | 9.2214100515  | 4.8850866165  | 9.4270996087  |         |               |               |               |
| C                      | 9.1377168988  | 6.2180644213  | 9.1049149528  |         |               |               |               |
| N                      | 7.8735576982  | 6.9044311230  | 9.1440091959  |         |               |               |               |
| N                      | 10.2281252235 | 6.9510279886  | 8.6469028966  |         |               |               |               |
| C                      | 7.6473316406  | 7.9111425779  | 8.2444831014  |         |               |               |               |
| C                      | 8.6874055411  | 8.4347624894  | 7.5027339634  |         |               |               |               |
| C                      | 9.9864296767  | 7.9985164494  | 7.8281120664  |         |               |               |               |
| H                      | 8.5203225132  | 9.2317902948  | 6.7862708008  |         |               |               |               |
| H                      | 10.8624920450 | 8.5333567129  | 7.4675273500  |         |               |               |               |
| H                      | 6.6320782901  | 8.3003264783  | 8.2230257436  |         |               |               |               |
| H                      | 6.7865492037  | 7.7564749774  | 10.7656297187 |         |               |               |               |

|         |               |               |               |         |               |               |               |
|---------|---------------|---------------|---------------|---------|---------------|---------------|---------------|
| H       | 23.6769975298 | 12.4625176712 | 10.0382621758 | C       | 15.3720163569 | 13.2694356076 | 7.6232314118  |
| C       | 22.1486563683 | 10.9904963595 | 10.5781146462 | O       | 14.2283214044 | 13.7991739469 | 7.4233891744  |
| H       | 21.9095669409 | 10.3418738802 | 11.4331218238 | O       | 15.4771332071 | 12.2268100449 | 8.3916208093  |
| H       | 21.2969274049 | 11.6800047856 | 10.4888288604 | H       | 18.2313800635 | 14.2774554036 | 9.8325479411  |
| C       | 22.2444734397 | 10.1362137006 | 9.3043510332  | H       | 18.6770839523 | 15.1803221601 | 6.9228229110  |
| H       | 23.0982308822 | 9.4471680030  | 9.3897508409  | H       | 19.6807246062 | 14.0238064543 | 7.7882923106  |
| H       | 22.4792691028 | 10.7843878249 | 8.4466287553  | H       | 17.6727328036 | 12.4817924993 | 8.0264828219  |
| C       | 20.9635441372 | 9.3416448216  | 9.0136261320  | H       | 18.1002976180 | 12.8189357812 | 6.3255086950  |
| H       | 20.1126658006 | 10.0313649109 | 8.9224569179  | Fe      | 13.4595896049 | 12.0756969799 | 8.3185155004  |
| C       | 21.0635890890 | 8.4932260167  | 7.7377111138  |         |               |               |               |
| C       | 19.8064152970 | 7.6869970559  | 7.4466519336  | Sol-(c) |               |               |               |
| O       | 18.7186743643 | 8.6200787249  | 7.1341830338  | C       | 6.4324400928  | 7.0357828636  | 10.8839839266 |
| C       | 17.5217449333 | 8.3677725947  | 7.7158406584  | H       | 6.4352916250  | 6.4928629832  | 11.8393034710 |
| O       | 16.6462618413 | 9.3080912737  | 7.3439950300  | H       | 5.6453869250  | 7.8000925699  | 10.9421070709 |
| O       | 17.2625878410 | 7.4309126284  | 8.4696573315  | H       | 6.1343101348  | 6.3239964254  | 10.1019127779 |
| H       | 20.7271559540 | 8.6891049476  | 9.8673706815  | C       | 7.8007246500  | 7.6614063104  | 10.5770351758 |
| H       | 21.2946124494 | 9.1331064925  | 6.8740692153  | H       | 8.0934697454  | 8.3402664919  | 11.3909175319 |
| H       | 21.9005339597 | 7.7817597396  | 7.8220148005  | H       | 8.5731987472  | 6.8793112830  | 10.5574997059 |
| H       | 19.5013022039 | 7.0658785953  | 8.2969362485  | C       | 7.8211923498  | 8.4268503808  | 9.2447672194  |
| H       | 19.9264191852 | 7.0434287755  | 6.5647715580  | H       | 7.0634367385  | 9.2245055079  | 9.2692912824  |
| Fe      | 14.8610140797 | 9.1967095670  | 7.6917313088  | H       | 7.5090537423  | 7.7539633432  | 8.4318940435  |
|         |               |               |               | C       | 9.1955996574  | 9.0263146115  | 8.9146903193  |
| Sol-(b) |               |               |               | H       | 9.9464464241  | 8.2246802676  | 8.8702014094  |
| C       | 7.2721225921  | 6.0819563051  | 11.1169904813 | C       | 9.2047014610  | 9.8009895438  | 7.5892254533  |
| H       | 7.5732485570  | 5.6336036119  | 12.0740167397 | C       | 10.5590812234 | 10.3999023641 | 7.2463263287  |
| H       | 6.2238728907  | 6.3958947680  | 11.2157132662 | O       | 11.4966799807 | 9.2980237323  | 6.9651009078  |
| H       | 7.3013972859  | 5.2878917397  | 10.3581002570 | C       | 12.7074525481 | 9.3576228351  | 7.5124985329  |
| C       | 8.1758690616  | 7.2603731747  | 10.7269618146 | O       | 13.5273671895 | 8.3996325968  | 7.2037546889  |
| H       | 8.1577601718  | 8.0247804571  | 11.5169687859 | O       | 13.0769808511 | 10.276319848  | 8.3139585604  |
| H       | 9.2217381485  | 6.9263135811  | 10.6683795440 | H       | 9.5184765113  | 9.6933006605  | 9.7280181060  |
| C       | 7.7750318199  | 7.9009320438  | 9.3889941377  | H       | 8.8752497754  | 9.1518112217  | 6.7655404807  |
| H       | 6.7307719850  | 8.2433132847  | 9.4439267282  | H       | 8.4807053152  | 10.6303972902 | 7.6314047066  |
| H       | 7.7884151810  | 7.1340764565  | 8.5998792281  | H       | 10.9676406600 | 11.0076118207 | 8.0612371203  |
| C       | 8.6852631893  | 9.0681525517  | 8.9815713389  | H       | 10.5253847619 | 11.0044425719 | 6.3307332351  |
| H       | 9.7273670470  | 8.7213801014  | 8.9370968685  | C       | 23.5288159099 | 11.1836263769 | 10.9842333675 |
| C       | 8.3000198326  | 9.6767173182  | 7.6255450936  | H       | 23.5432452773 | 11.6014857209 | 12.0005271921 |
| C       | 9.2141577250  | 10.8120085699 | 7.1885361842  | H       | 24.3313223212 | 10.4356512208 | 10.9246128706 |
| O       | 10.5658905409 | 10.2663677778 | 6.9800098440  | H       | 23.7911829766 | 11.9950404527 | 10.2914225632 |
| C       | 11.5883684534 | 10.8312002580 | 7.6221489987  | C       | 22.1637381144 | 10.5725510614 | 10.6370937740 |
| O       | 12.7398563566 | 10.2895704045 | 7.5012635642  | H       | 21.9097154723 | 9.7855875041  | 11.3616737322 |
| O       | 11.4451865917 | 11.9198024854 | 8.3182139317  | H       | 21.3762909275 | 11.3322214806 | 10.7447766635 |
| H       | 8.6638394607  | 9.8503767524  | 9.7549564776  | C       | 22.1113244608 | 9.9910788996  | 9.2154740273  |
| H       | 8.2942857626  | 8.8967680116  | 6.8508524410  | H       | 22.8843648994 | 9.2155428289  | 9.1061643239  |
| H       | 7.2735937072  | 10.0753547363 | 7.6652444493  | H       | 22.3799987547 | 10.7744212835 | 8.4908063934  |
| H       | 9.2696317748  | 11.6161750443 | 7.9299802315  | C       | 20.7353059219 | 9.4131114477  | 8.8569799497  |
| H       | 8.9131430430  | 11.2363029941 | 6.2222215680  | H       | 19.9690458422 | 10.1926382408 | 8.9705366972  |
| C       | 19.5490237737 | 18.0811401140 | 11.1675083874 | C       | 20.6726957092 | 8.8528852893  | 7.4282418844  |
| H       | 19.2199836969 | 18.5396152774 | 12.1104504442 | C       | 19.3005503830 | 8.3150448768  | 7.0557652264  |
| H       | 20.5991657767 | 17.7842099154 | 11.2946619363 | O       | 18.3667076137 | 9.4561201161  | 7.0425149901  |
| H       | 19.5256417784 | 18.8630838817 | 10.3959512825 | C       | 17.1285427795 | 9.2476878465  | 7.4751350321  |
| C       | 18.6713958886 | 16.8838556244 | 10.7752811026 | O       | 16.3370511069 | 10.2717216528 | 7.5060373720  |
| H       | 18.6813397603 | 16.1323230146 | 11.5777202175 | O       | 16.7072515085 | 8.1078266315  | 7.8749952749  |
| H       | 17.6226754663 | 17.2019631873 | 10.6866948776 | H       | 20.4625828465 | 8.6219173952  | 9.5713586657  |
| C       | 19.1134624690 | 16.2279813936 | 9.4576301281  | H       | 20.9688476043 | 9.6247986101  | 6.7036843848  |
| H       | 20.1593441401 | 15.8974593314 | 9.5450218286  | H       | 21.3944870303 | 8.0291211409  | 7.3091131036  |
| H       | 19.1131463125 | 16.9832425669 | 8.6572967482  | H       | 18.9320779400 | 7.5712748062  | 7.7711489822  |
| C       | 18.2253124571 | 15.0454524083 | 9.0448356236  | H       | 19.2789250705 | 7.8800471912  | 6.0481665517  |
| H       | 17.1820293842 | 15.3824753967 | 8.9652941787  | Fe      | 14.9333331619 | 9.1424962955  | 8.4123715457  |
| C       | 18.6535976164 | 14.4150173065 | 7.7117455734  | O       | 14.9392250218 | 8.9972665125  | 10.2157182276 |
| C       | 17.7590313257 | 13.2667713788 | 7.2674886658  | H       | 14.1080801804 | 9.0764404312  | 10.7123623800 |
| O       | 16.4169234930 | 13.8015486479 | 6.9860331956  |         |               |               |               |

## Reference

- (1) Lao, D.; K Kukkadapu, R.; Kovarik, L.; W Arey, B.; J Heldebrant, D.; K Nune, S. Switchable Ionic Liquids: An Environmentally Friendly Medium to Synthesise Nanoparticulate Green Rust, *Current Inorganic Chemistry* **2016**, *6*, 92-99.
- (2) Yang, L.; Yu, X. Y.; Zhu, Z. H.; Thevuthasan, T.; Cowin, J. P. Making a hybrid microfluidic platform compatible for in situ imaging by vacuum-based techniques, *J Vac Sci Technol A* **2011**, *29*.
- (3) Yang, L.; Yu, X. Y.; Zhu, Z. H.; Iedema, M. J.; Cowin, J. P. Probing liquid surfaces under vacuum using SEM and ToF-SIMS, *Lab Chip* **2011**, *11*, 2481-2484.
- (4) Zheng, J.; Zhang, W.; Wang, F.; Yu, X. Y. Enabling liquid solvent structure analysis using hard x-ray absorption spectroscopy with a transferrable microfluidic reactor, *J Phys-Condens Mat* **2018**, *30*.
- (5) Khalid, S.; Ehrlich, S.; Lenhard, A.; Clay, B. Hard X-rays QEXAFS instrumentation with scan range 20 to 4000eV, *Nuclear Instruments and Methods in Physics Research Section A: Accelerators, Spectrometers, Detectors and Associated Equipment* **2011**, *649*, 64-66.
- (6) Ravel, B.; Newville, M. ATHENA, ARTEMIS, HEPHAESTUS: data analysis for X-ray absorption spectroscopy using IFEFFIT, *J Synchrotron Radiat* **2005**, *12*, 537-541.
- (7) Ikuno, T.; Zheng, J.; Vjunov, A.; Sanchez-Sanchez, M.; Ortuno, M. A.; Pahls, D. R.; Fulton, J. L.; Camaioni, D. M.; Li, Z. Y.; Ray, D.; Mehdi, B. L.; Browning, N. D.; Farha, O. K.; Hupp, J. T.; Cramer, C. J.; Gagliardi, L.; Lercher, J. A. Methane Oxidation to Methanol Catalyzed by Cu-Oxo Clusters Stabilized in NU-1000 Metal-Organic Framework, *J Am Chem Soc* **2017**, *139*, 10294-10301.
- (8) Rehr, J. J.; Kas, J. J.; Vila, F. D.; Prange, M. P.; Jorissen, K. Parameter-free calculations of X-ray spectra with FEFF9, *Phys Chem Chem Phys* **2010**, *12*, 5503-5513.
- (9) VandeVondele, J.; Krack, M.; Mohamed, F.; Parrinello, M.; Chassaing, T.; Hutter, J. QUICKSTEP: Fast and accurate density functional calculations using a mixed Gaussian and plane waves approach, *Computer Physics Communications* **2005**, *167*, 103-128.
- (10) Perdew, J. P.; Burke, K.; Ernzerhof, M. Generalized gradient approximation made simple, *Physical Review Letters* **1996**, *77*, 3865-3868.
- (11) Grimme, S.; Antony, J.; Ehrlich, S.; Krieg, H. A consistent and accurate ab initio parametrization of density functional dispersion correction (DFT-D) for the 94 elements H-Pu, *J Chem Phys* **2010**, *132*.
- (12) Lippert, G.; Hutter, J.; Parrinello, M. A hybrid Gaussian and plane wave density functional scheme, *Mol Phys* **1997**, *92*, 477-487.
- (13) VandeVondele, J.; Hutter, J. Gaussian basis sets for accurate calculations on molecular systems in gas and condensed phases, *J Chem Phys* **2007**, *127*.
